# Supplementary material for: Ontogeny and brooding strategy of the early Cambrian arthropod Isoxys minor from the Qingjiang biota
Source: Frontiers journal article supplement (doi:10.3389/fevo.2023.1174564), 2023-05-25
Supplement: Data_Sheet_1.pdf [file Data_Sheet_1.pdf]

## *Supplementary Material*

### 1 Supplementary Data

**Supplementary Data 1.** The R code of elliptical Fourier analysis.

### 2 Supplementary Figures and Tables

#### 2.1 Supplementary Figures

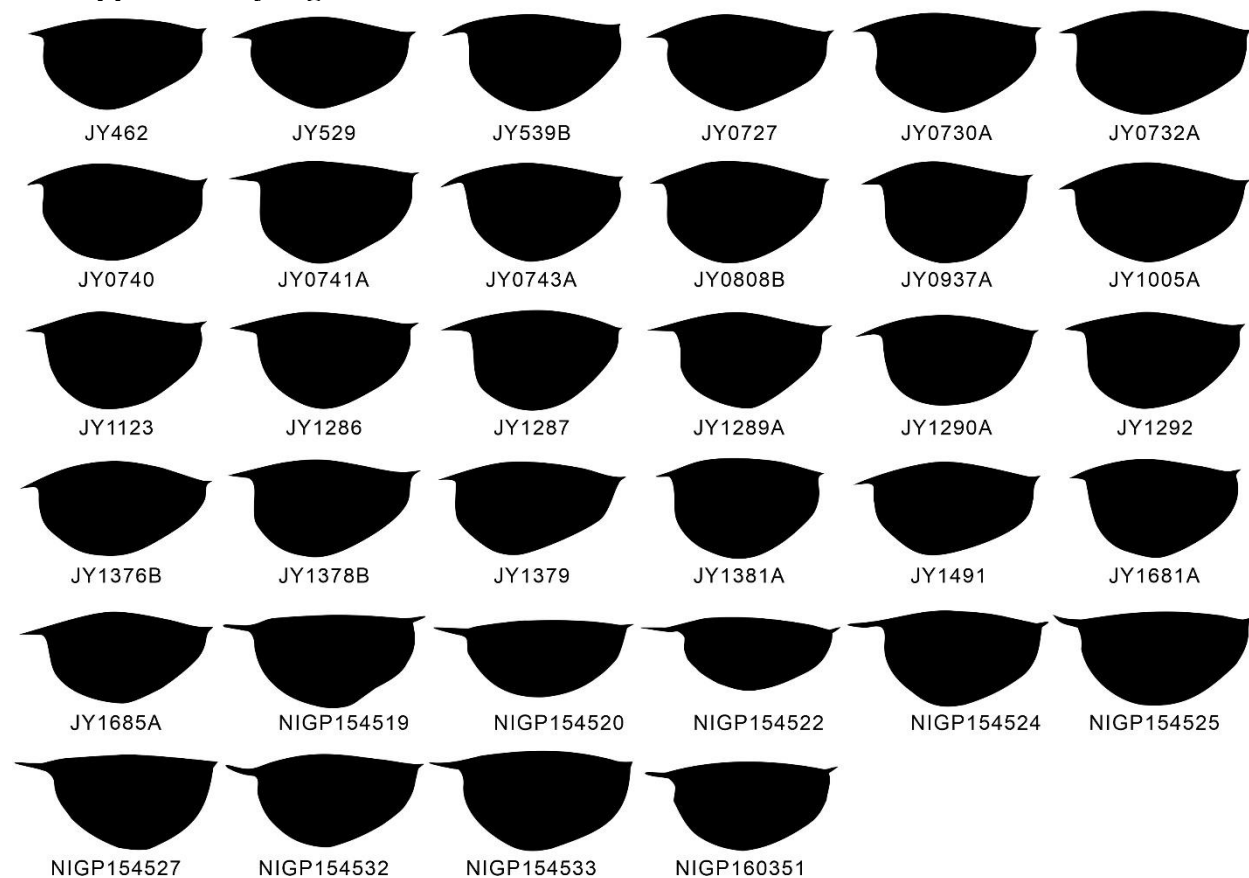

**Supplementary Figure 1.** Outlines of all specimens from the Qingjiang and Guanshan biotas analyzed, related to Figure 1.

#### 2.2 Supplementary Tables

**Supplementary Table 1.** Outlines source of †*Isoxys minor* from the Guanshan biota in elliptical Fourier analysis, related to Figure 1.

**Supplementary Table 2.** Data of size measurements in carapaces and eyes of †*Isoxys minor* from the Qingjiang biota.

**Supplementary Table 3.** Data of the regression analysis of †*Isoxys minor* from the Qingjiang biota, related to Figure 2D.
